# Supplementary material for: Photostable AIE probes for wash-free, ultrafast, and high-quality plasma membrane staining
Source: Royal Society of Chemistry journal article supplement (doi:10.1039/d1tb00049g), 2021-01-01
Supplement: d1tb00049g1.pdf [file d1tb00049g1.pdf]

## Electronic Supplementary Information

### **Photostable AIE probes for wash-free, ultrafast, and high-quality plasma membrane staining**

Sayed Mir Sayed,<sup>†,a</sup> Hao-Ran Jia,<sup>†,a</sup> Yao-Wen Jiang,<sup>a</sup> Ya-Xuan Zhu,<sup>a</sup> Liang Ma,<sup>a</sup> Feifei Yin,<sup>a</sup>  
Imtiaz Hussain,<sup>a</sup> Arshad Khan,<sup>a</sup> Qian Ma,<sup>b</sup> Fu-Gen Wu,<sup>\*,a</sup> and Xiaolin Lu<sup>\*,a</sup>

*<sup>a</sup>State Key Laboratory of Bioelectronics, School of Biological Science and Medical Engineering,  
Southeast University, 2 Sipailou Road, Nanjing 210096, P. R. China*

*<sup>b</sup>Jiangsu Key Laboratory of Oral Diseases, Nanjing Medical University; Department of General  
Dentistry, Affiliated Hospital of Stomatology, Nanjing Medical University, Nanjing 210029,  
Jiangsu Province, China*

#### **Corresponding authors**

\*(X.L.) E-mail: lxl@seu.edu.cn

\*(F.G.W.) E-mail: wufg@seu.edu.cn

#### **Author contributions**

<sup>†</sup>S.M.S. and H.R.J. contributed equally to this work.

## Cell culture

MCF-7, A549, and AT II cells were cultured in Dulbecco's modified Eagle's medium (DMEM) supplemented with 10% FBS and 100 IU/mL penicillin–streptomycin at 37°C in a humid atmosphere (5% CO<sub>2</sub>). 4T1 cells were cultured in Roswell Park Memorial Institute (RPMI) 1640 medium supplemented with 10% FBS and 100 IU/mL penicillin–streptomycin at 37°C in a humid atmosphere (5% CO<sub>2</sub>).

## Cytotoxicity evaluation

MCF-7 cells were seeded into 96-well plates at a density of  $5 \times 10^3$  cells per well and incubated for 24 h. Then, MCF-7 cells were treated with different concentrations (0, 1, 2.5, 5, 10, 25, 50, and 100 µg/mL) of TPE-NIM and TPE-NIM<sup>+</sup>, respectively, followed by another incubation for 24 h. The cell viability was determined by CCK-8 assays: 10 µL of CCK-8 solution was added to each well and incubated at 37°C for 2 h. Next, the optical density (OD) at 450 nm was measured by a microplate reader (Multiskan FC, Thermo-Scientific, USA) and the cell viability was calculated as follows:

$$\text{Cell viability (\%)} = (\text{OD}_{\text{Sample}} - \text{OD}_{\text{Blank}}) / (\text{OD}_{\text{Control}} - \text{OD}_{\text{Blank}}) \times 100\%$$

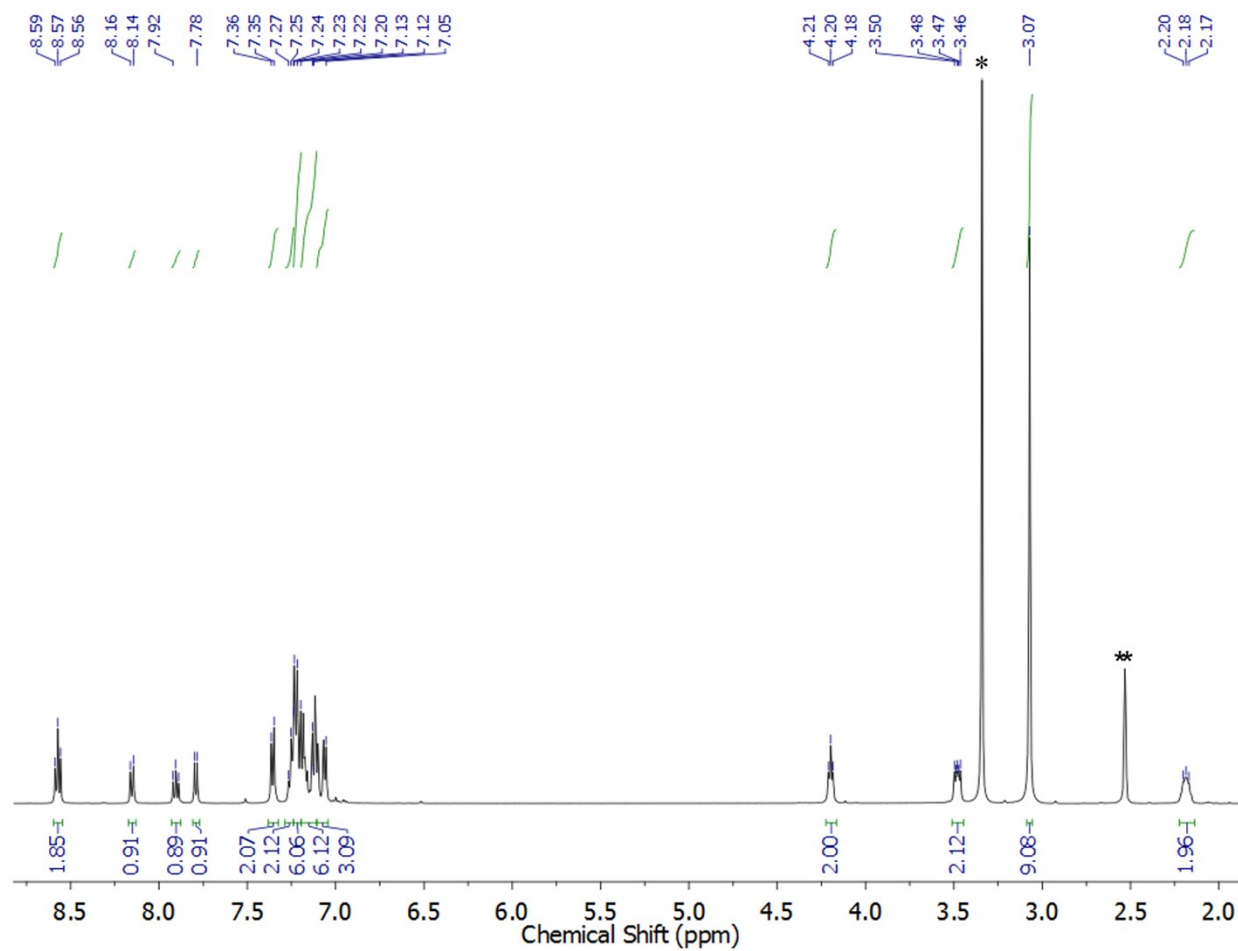

**Fig. S1.**  $^1\text{H}$ -NMR spectrum of TPE-NIM $^+$ . The solvent peaks are marked with asterisks (DMSO- $d_6^{**}$  and water\*).<sup>1</sup>

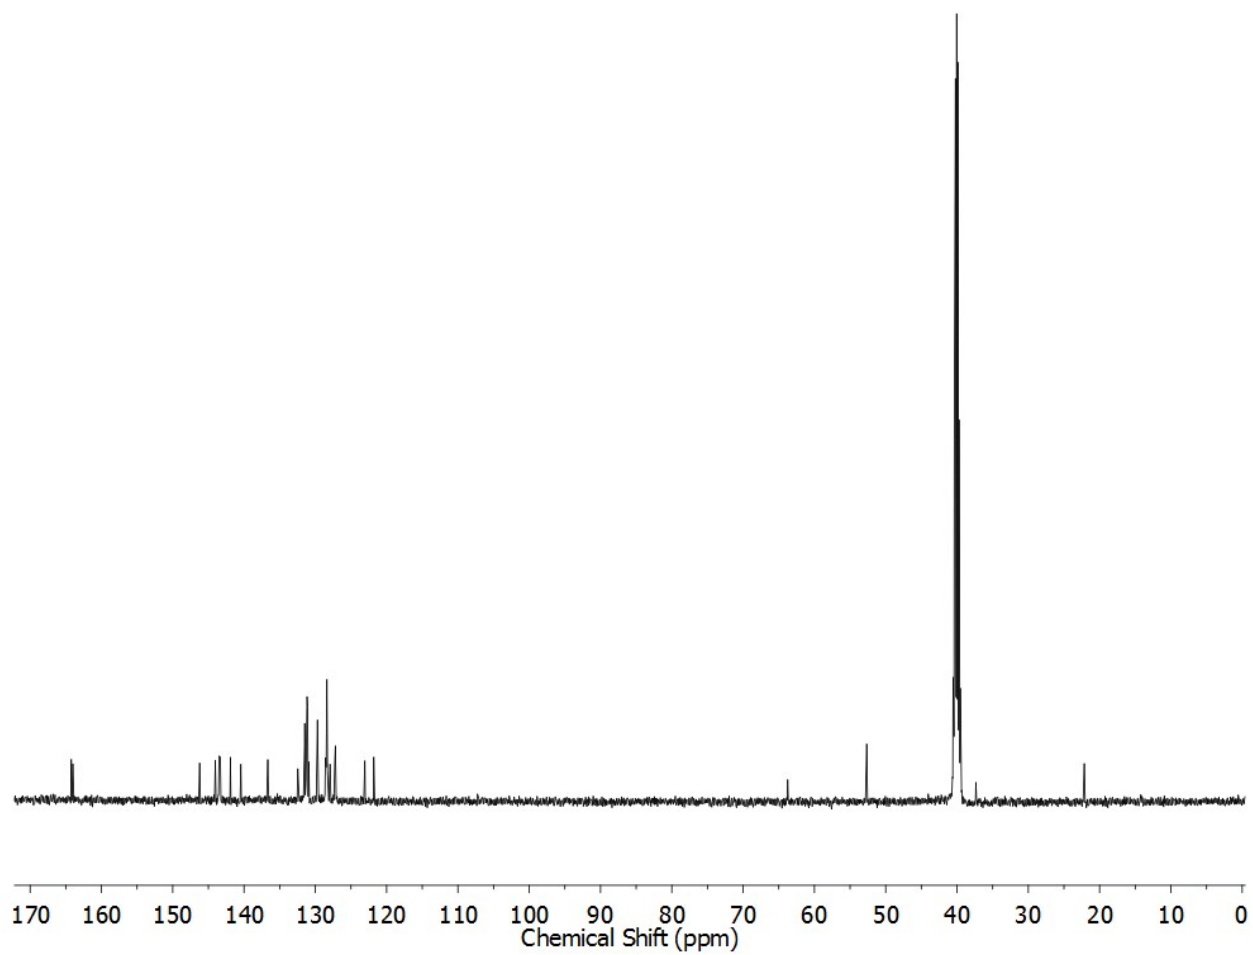

**Fig. S2.**  $^{13}\text{C}$ -NMR spectrum of TPE-NIM<sup>+</sup>.

|             |        |                        |         |                 |                                    |
|-------------|--------|------------------------|---------|-----------------|------------------------------------|
| Sample Name | 4#     | Position               | Vial 4  | Instrument Name | Instrument 1                       |
| User Name   |        | Inj Vol                | 1       | InjPosition     |                                    |
| Sample Type | Sample | IRM Calibration Status | Success | Data Filename   | 20201025-4.d                       |
| ACQ Method  | 1025.m | Comment                |         | Acquired Time   | 10/25/2020 10:49:19 AM (UTC+08:00) |

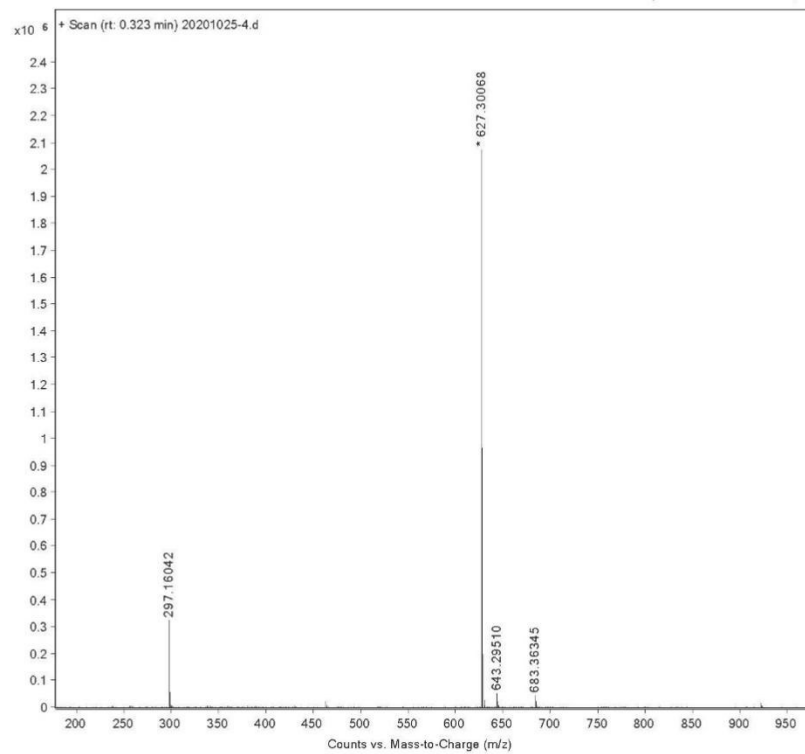

**Fig. S3.** HRMS spectrum of TPE-NIM<sup>+</sup>.

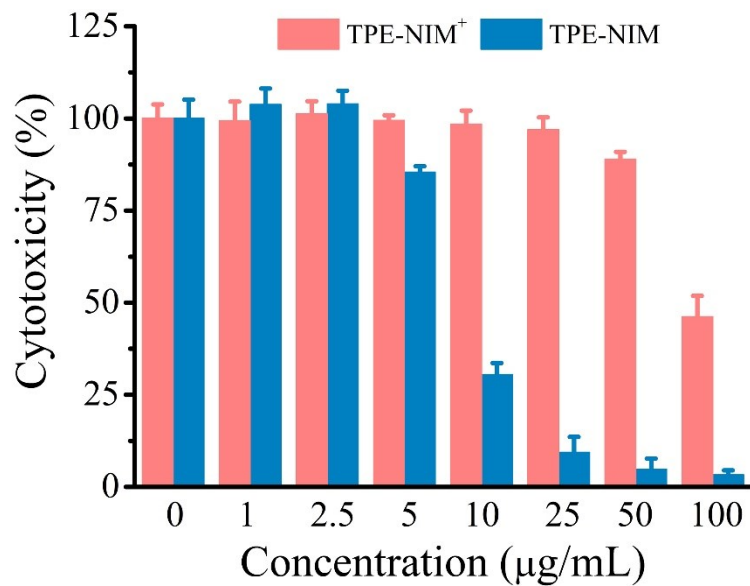

**Fig. S4.** Relative viabilities of MCF-7 cells incubated with different concentrations of TPE-NIM<sup>+</sup> and TPE-NIM for 24 h.

## Reference

1. G. R. Fulmer, A. J. M. Miller, N. H. Sherden, H. E. Gottlieb, A. Nudelman, B. M. Stoltz, J. E. Bercaw and K. I. Goldberg, *Organometallics*, 2010, **29**, 2176–2179.
